# Supplementary material for: Brain activation differences in schizophrenia during context-dependent processing of saccade tasks
Source: Springer Nature journal article supplement (doi:10.1186/s12993-016-0103-2), 2016-06-24
Supplement: MOESM1 [file 10544484]

# Effect of Trial Position on Saccade Performance Measures

## Antisaccades

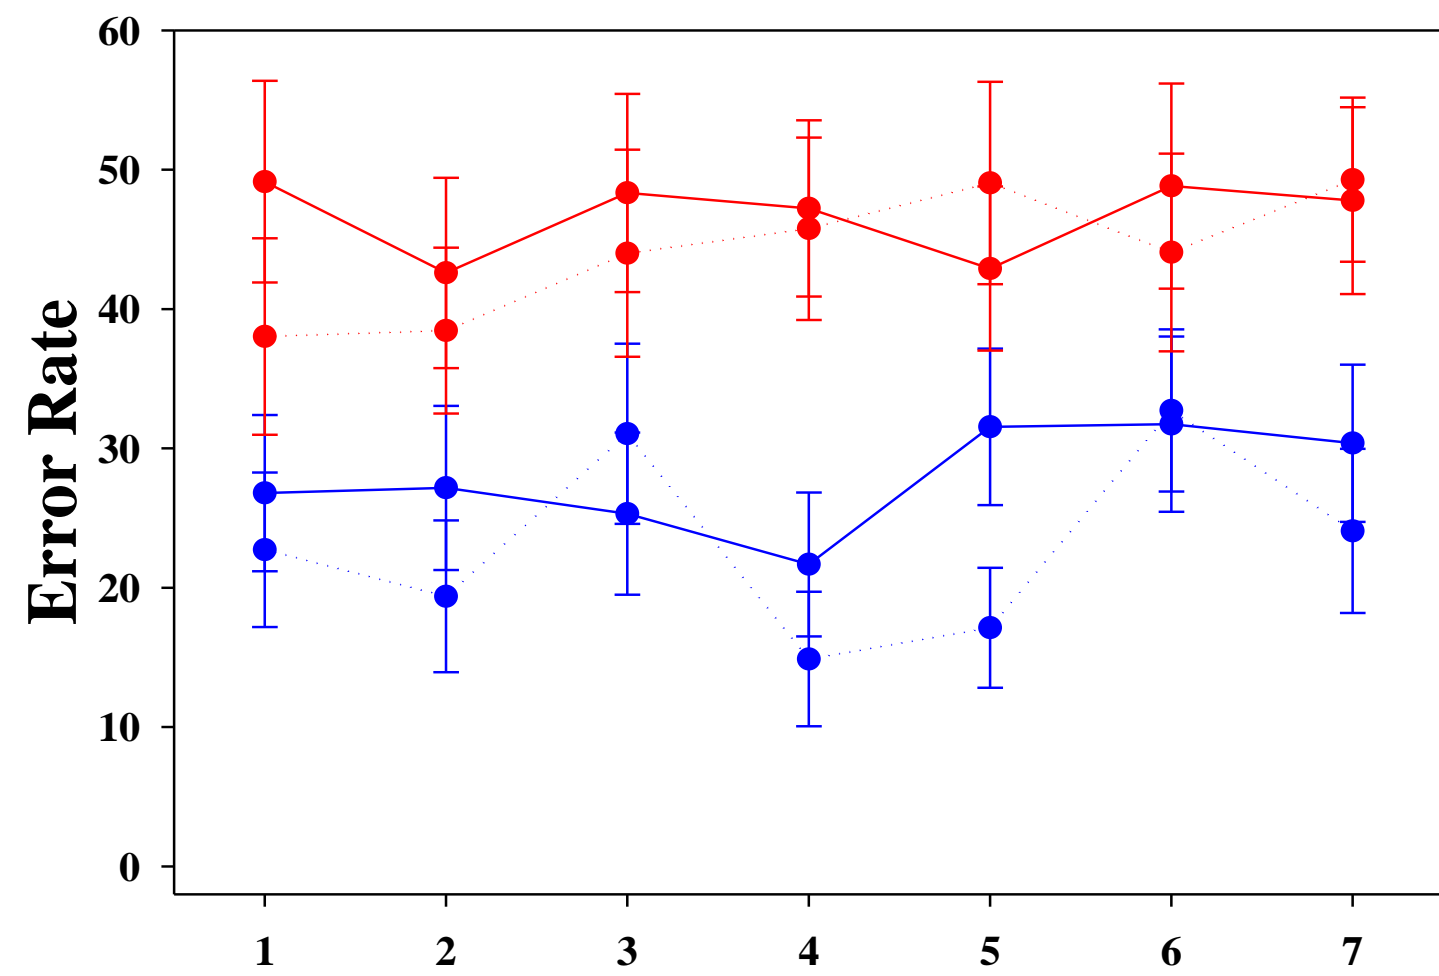

## Prosaccades

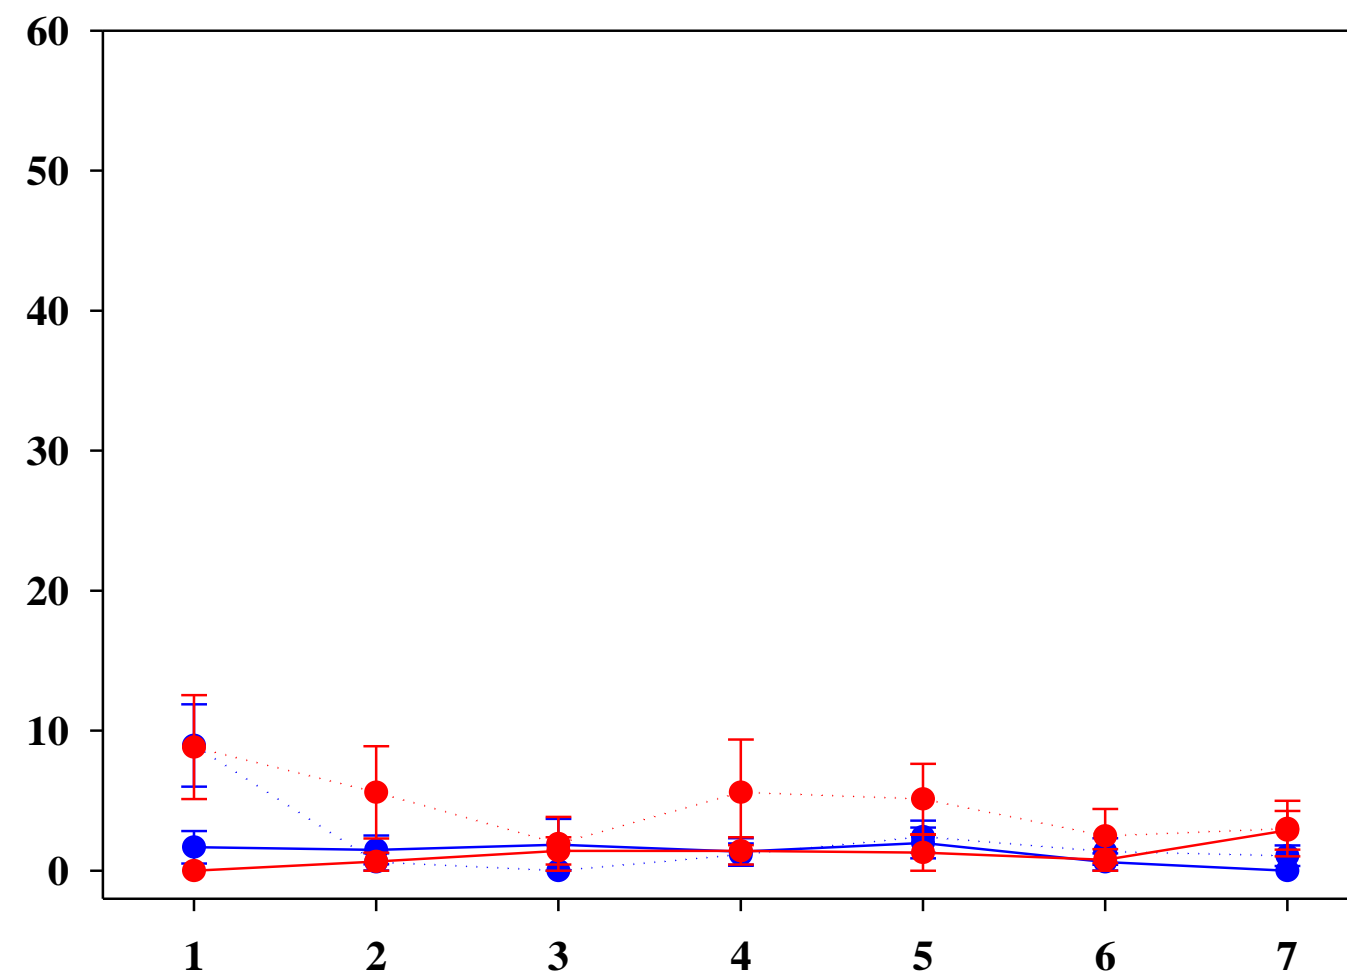

- C Single Task Run
- C Dual Task Run
- SZ Single Task Run
- SZ Dual Task Run

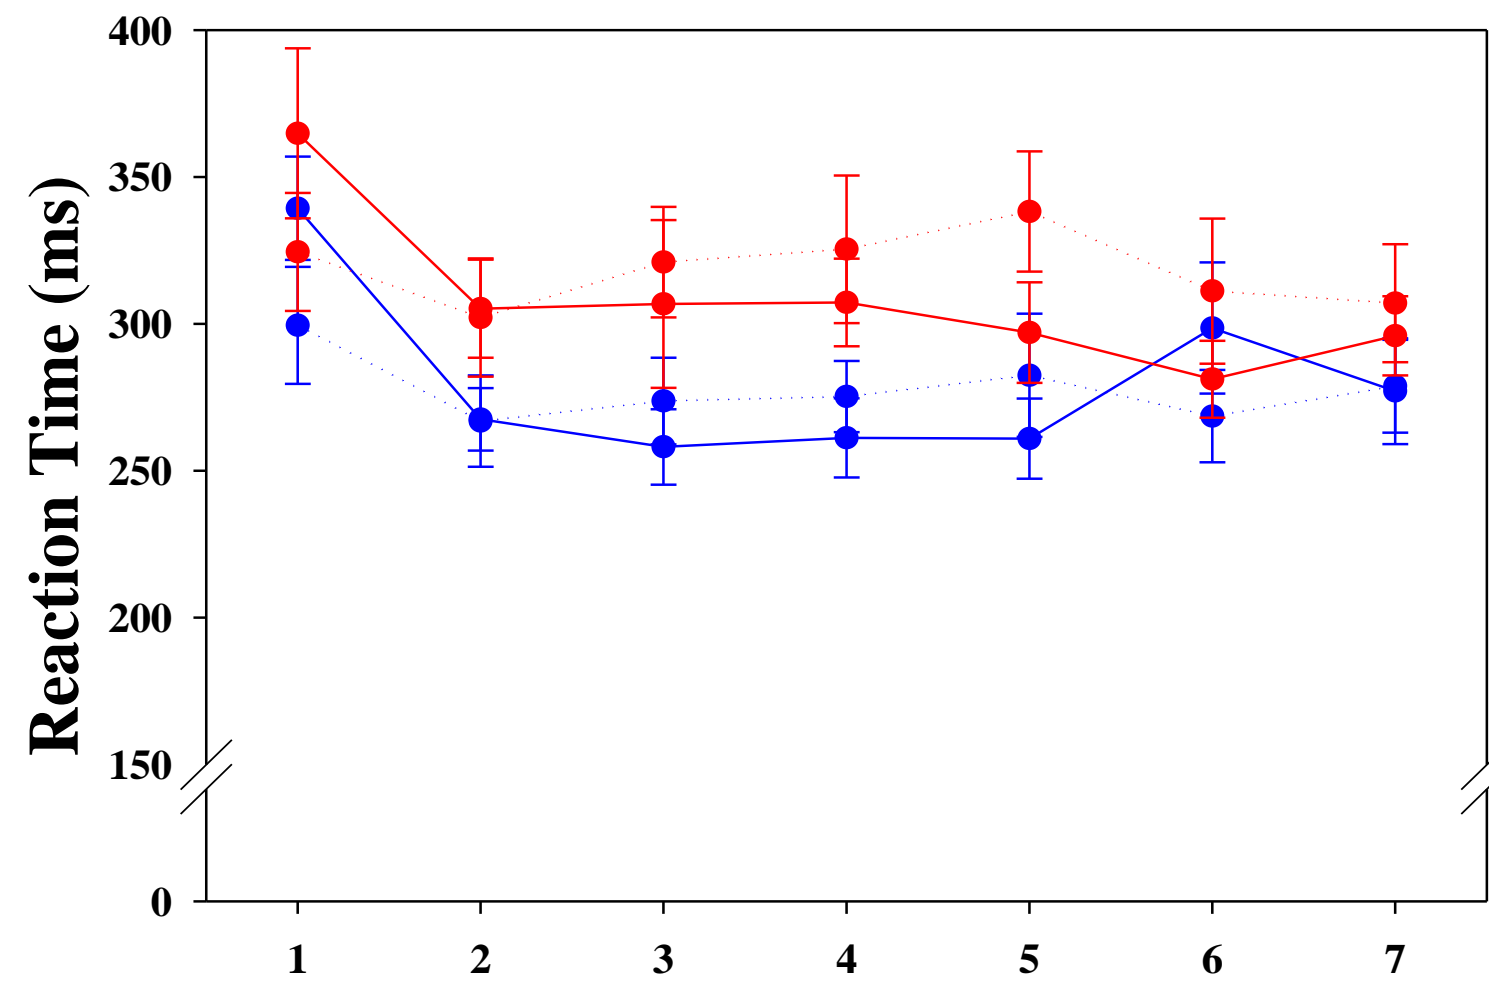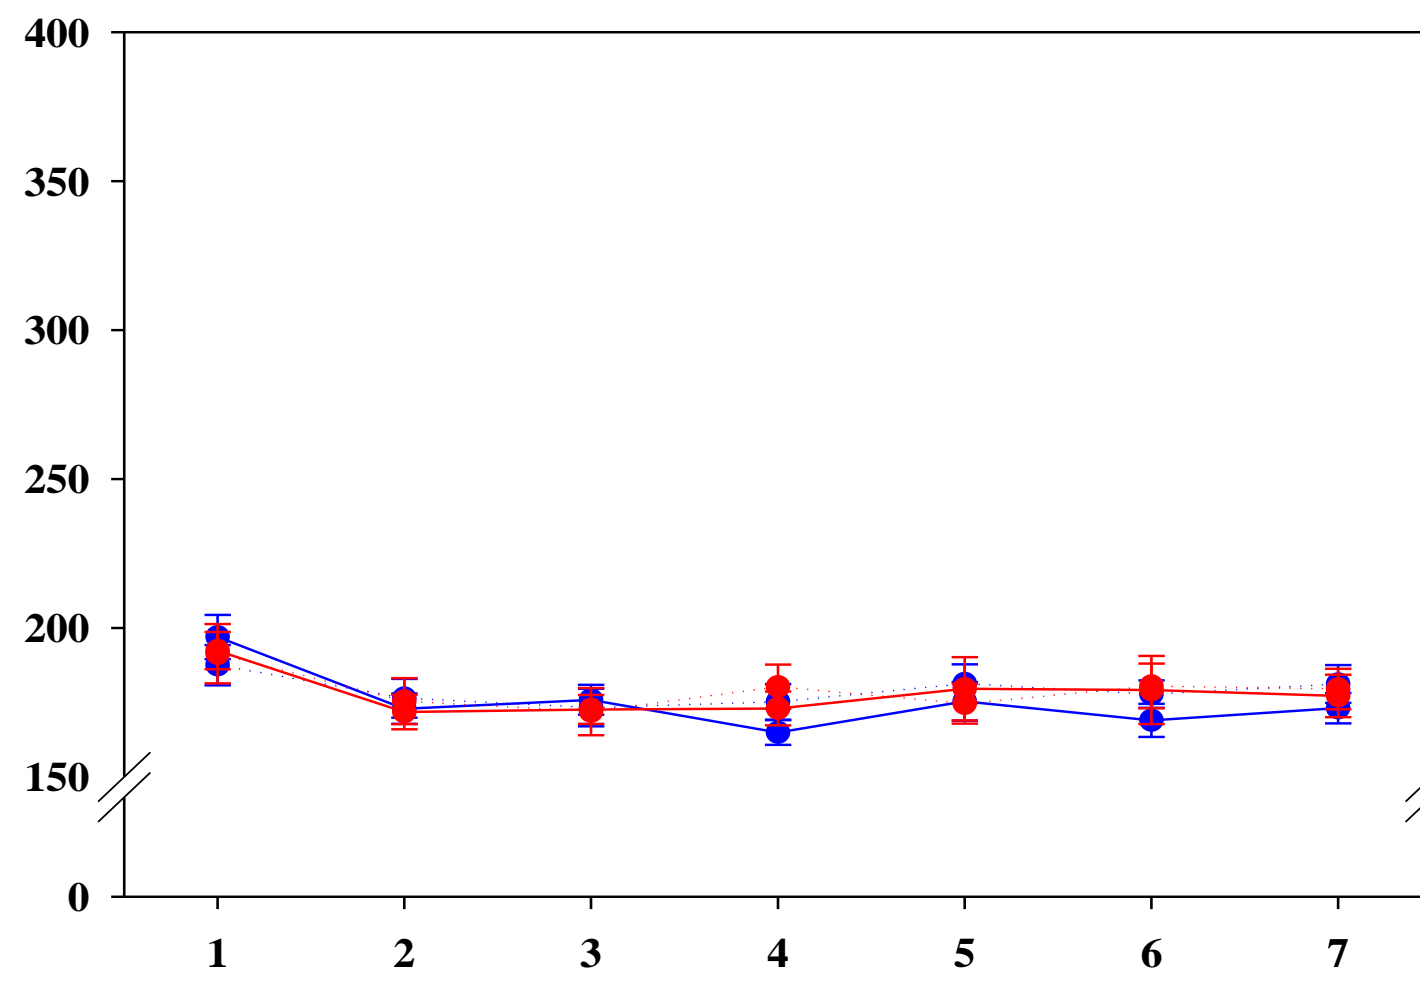

Trial Position

Trial Position
